# Supplementary material for: Functional connectivity of intrinsic cognitive networks during resting state and task performance in preadolescent children
Source: PubMed Central journal article supplement (PMC6192623; doi:10.1371/journal.pone.0205690), 2018-10-17
Supplement: pone.0205690.s006.pdf [file pone.0205690.s006.pdf]

## S1 Fig. Resting state networks in adults and children

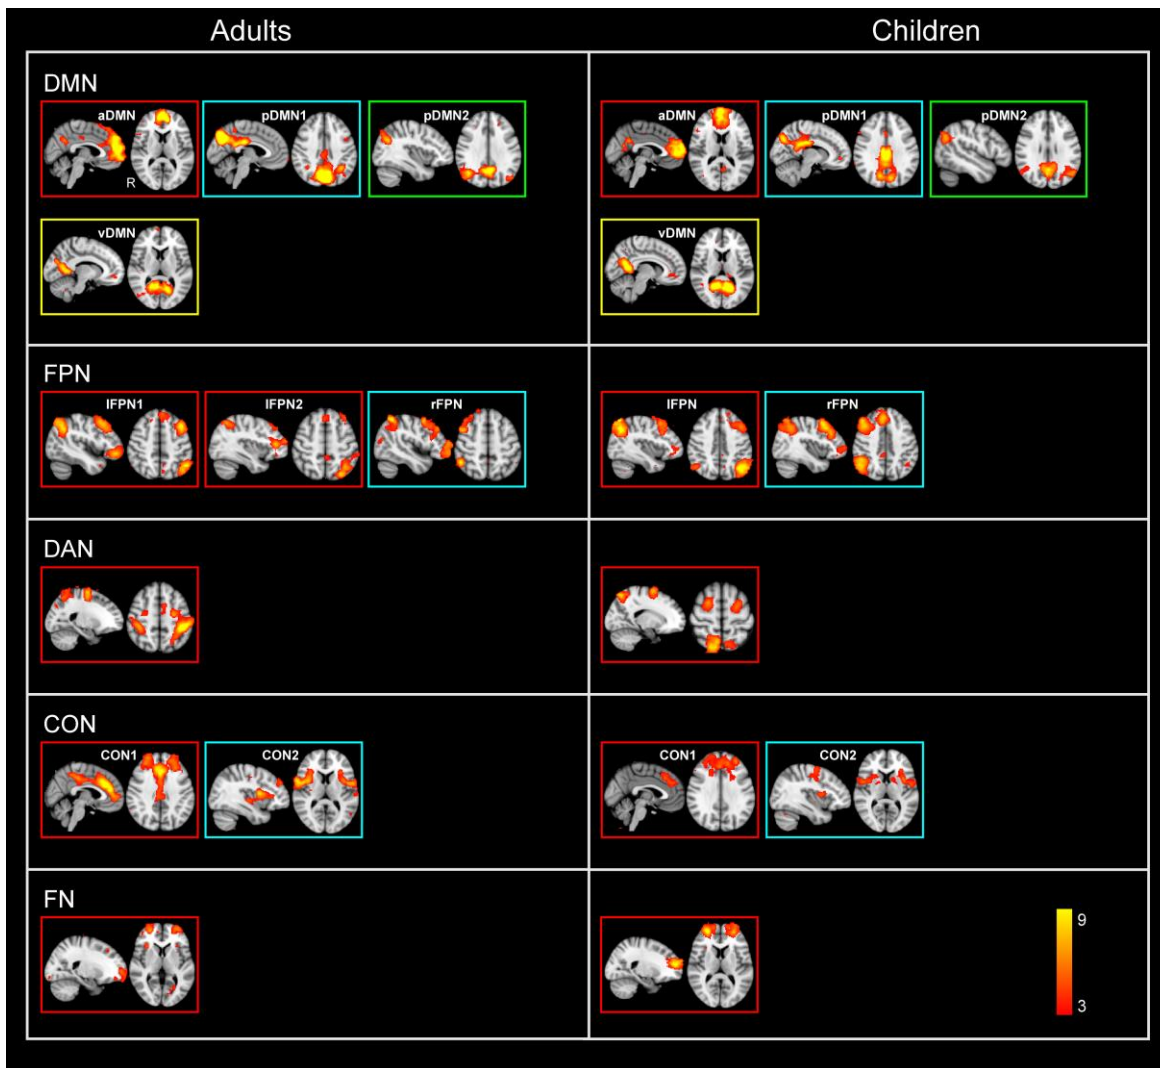

The resting state networks are illustrated in adults and children separately. The spatial maps of neurocognitive networks (thresholded at  $Z > 3$ ) shown here represent anterior, posterior and ventral subnetworks of the default mode network (a/p/v DMN), and the left and right frontoparietal (l/r FPN), dorsal attentional (DAN), cingulo-opercular (CON), and frontopolar (FN) networks. The spatial maps are displayed in sagittal and axial views and superimposed on the MNI152 standard space template image. The adults had two IFPNs (IFPN1, IFPN2), whereas children had only one IFPN. The spatial distribution of the core regions of the IFPN in children resembled that of the IFPN1 in adults
